# Supplementary material for: Monodisperse CoSb nanocrystals as high-performance anode material for Li-ion batteries
Source: Royal Society of Chemistry journal article supplement (doi:10.1039/d0cc06222g), 2020-01-01
Supplement: d0cc06222g1.pdf [file d0cc06222g1.pdf]

*Supporting Information for*

Monodisperse CoSb Nanocrystals as High  
Performance Anode Material for Li-Ion Batteries

*Shutao Wang,<sup>1,2,#</sup> Meng He,<sup>1,2</sup> Marc Walter,<sup>1,2</sup> Kostiantyn V. Kravchyk,<sup>\*1,2</sup> and Maksym V. Kovalenko<sup>\*,1,2</sup>*

<sup>1</sup> Laboratory of Inorganic Chemistry, Department of Chemistry and Applied Biosciences,  
ETH Zürich, Vladimir-Prelog-Weg 1, CH-8093 Zürich, Switzerland

<sup>2</sup> Laboratory for Thin Films and Photovoltaics, Empa – Swiss Federal Laboratories for  
Materials Science and Technology, Überlandstrasse 129, CH-8600 Dübendorf, Switzerland

Corresponding Author

\*E-mail: [mvkovalenko@ethz.ch](mailto:mvkovalenko@ethz.ch)

Present Address

# Department of Chemistry, University College London, 20 Gordon Street, London, WC1H  
0AJ, United Kingdom

## Materials and Methods

### I. Materials

**Chemicals and solvents.** Cobalt (II) chloride (99.99%, Aldrich), antimony (III) chloride ( $\text{SbCl}_3$ , 99.999%, ABCR), lithium diisopropylamide ( $\text{LiN}(\text{iPr})_2$ , 97%, Sigma-Aldrich), 1-methyl-2-pyrrolidinone (Fisher BioReagents, anhydrous, 99.5%), sodium borohydride (ABCR-Chemicals, 98%), oleylamine (OLA, 90%, ACROS), oleic acid (OA, 90%, Aldrich), toluene (99.9%, Sigma-Aldrich), ethanol ( $\geq 99.9\%$ , Scharlau), Hydrazine (Gerling Holz+Co) were used as received. Hydrazine (Gerling Holz+Co) and acetonitrile (ACN, Sigma-Aldrich) were used as received. OLA was dried prior to use at  $100^\circ\text{C}$  under vacuum overnight.

**Battery materials/components.** Carboxymethyl cellulose (CMC, Daicel Fine Chem Ltd.), carbon black (Super C65, TIMCAL), 4-fluoro-1, 3-dioxolan-2-one (FEC,  $>98.0\%$ , TCI), 1 M solution of  $\text{LiPF}_6$  in ethylene carbonate/dimethyl carbonate (EC/DMC, Novolyte), a glass microfiber separator (GF/D, Cat No.1823-257, Whatman), coin-type cells (Hohsen Corp., Japan).

### II. Methods

**Synthesis of CoSb NCs.** In a typical synthesis of 10 nm CoSb NCs, dried OLA (12 mL) was mixed with  $\text{CoCl}_2$  (0.065 g, 0.5 mmol) in a 50-mL three-neck flask, additionally dried under vacuum for 45 minutes at  $120^\circ\text{C}$  and then heated to  $270^\circ\text{C}$  under nitrogen atmosphere. Afterward,  $\text{LiN}(\text{iPr})_2$  solution (3.6 mmol, *i.e.*  $\sim 0.38$  g, in 2 mL of OLA) was injected in the reaction mixture, followed by the injection of 0.5 mmol of  $\text{SbCl}_3$  solution ( $\sim 0.114$  g, in 0.2 mL of toluene and 0.8 mL of ODE) in 30 seconds. The reaction mixture was kept for 15 h at  $270^\circ\text{C}$  and then quenched quickly by cooling with an ice-water bath, followed by the injection of anhydrous toluene (12 mL) at *ca.*  $150^\circ\text{C}$ . Upon cooling,  $\sim 0.4$  mL of oleic acid was added to the flask at *ca.*  $50^\circ\text{C}$ . Afterward, CoSb NCs were precipitated by adding ethanol ( $\sim 60$  mL), followed by centrifugation at 8500 rpm for 4 min. Then, CoSb NCs were redispersed in toluene (12 mL) comprising oleic acid ( $\sim 0.25$  mL), and subsequently precipitated by ethanol (12 mL) and centrifuged at 8000 rpm for 1 min. Finally, CoSb NCs were dispersed in common nonpolar solvents such as toluene or chloroform.

**Synthesis of CoSb<sub>2</sub> NCs.** CoSb<sub>2</sub> NCs were synthesized and purified according to the procedure developed for CoSb NCs, by doubling the molar amount of  $\text{SbCl}_3$  to  $\text{CoCl}_2$  (see **Table S2** for detailed experimental conditions).

**Ligand Removal.** NCs were precipitated with ethanaol, centrifuged at 8000 rpm for 4 min and redispersed in a acetonitrile/hydrazine solution (31.25:1 vol. ratio). Afterward, NCs/acetonitrile/hydrazine suspension was stirred for 2h at room temperature. Then, NCs were centrifuged at 8000 rpm for 4 min and washed three times with acetonitrile (~20 mL) to remove residual hydrazine. Lastly, NCs were separated from the solution by centrifugation (8000 rpm, 4 min) and dried under vacuum for 12h at room temperature.

**Assembly of Li-ion batteries and their electrochemical testing.** Electrodes composed of CoSb, CoSb<sub>2</sub> or Sb NCs were prepared as follows: the respective NCs after ligand removal were mixed with carbon black and CMC binder in the weight ratio of 64:21:15 for 1h by ball-milling using deionized water as a solvent. Obtained slurry was brush-painted on the Cu foil. The prepared electrodes were dried for 12h at room temperature in the ambient atmosphere and then for 2h under vacuum at 80°C. Electrode active material loadings were in the range of 0.5–0.6 mg cm<sup>-2</sup> that corresponds to the areal capacity of *ca.* 0.3 mAh cm<sup>-2</sup>. The thickness of prepared electrodes was *ca.* 20-25 μm. Coin-type cells (Hohsen Corp.) were assembled in an argon-filled glove box (O<sub>2</sub> < 0.1 ppm, H<sub>2</sub>O < 0.1 ppm) using one layer of glass fiber separator. Li disc was used as the counter and reference electrode. 1 M LiPF<sub>6</sub> solution in EC/DMC (1:1 in volume) + 3 wt. % of FEC was used as an electrolyte (200 μL per cell). The galvanostatic cycling measurements were performed by a Lanhe (Wuhan, China) battery test system using voltage window of 0.02-1.5V *vs.* Li<sup>+</sup>/Li. The obtained charge storage capacities of were normalized to their mass of NCs. Cyclic voltammetry was carried out using a MPG2 multi-channel workstation (Bio Logic).

### III. Characterization

**Material characterization.** Transmission Electron Microscopy (TEM) images were collected using a Philips CM30 TEM microscope at 300 kV. Carbon-coated TEM grids (Ted-Pella) were used as substrates. Powder X-ray diffraction (XRD) was performed on a STOE STADI P powder X-ray diffractometer.

**Table S1.** Experimental conditions for CoSb NCs synthesis.

| # | OLA,<br>mL | CoCl <sub>2</sub> ,<br>mmol | T(inj),<br>°C | LiN(iPr) <sub>2</sub> ,<br>mmol | SbCl <sub>3</sub> ,<br>mmol | Reaction<br>time, | Mean size,<br>nm | S, %  |
|---|------------|-----------------------------|---------------|---------------------------------|-----------------------------|-------------------|------------------|-------|
| 1 | 10         | 0.5                         | 210           | 3.6                             | 0.5                         | 12 h              | 4.44             | 12.16 |
| 2 | 12         | 0.5                         | 270           | 3.6                             | 0.5                         | 15 h              | 9.73             | 21.27 |
| 3 | 36         | 1.5                         | 270           | 10.8                            | 1.5                         | 16 h              | 16.85            | 19.28 |
| 4 | 60         | 5                           | 270           | 18                              | 5                           | 20 h              | 44.47            | 20.73 |

**Table S2.** Experimental conditions for CoSb<sub>2</sub> NCs synthesis.

| # | OLA,<br>mL | CoCl <sub>2</sub> ,<br>mmol | T(inj),<br>°C | LiN(iPr) <sub>2</sub> ,<br>mmol | SbCl <sub>3</sub> ,<br>mmol | Reaction<br>time, | Mean size,<br>nm | S, % |
|---|------------|-----------------------------|---------------|---------------------------------|-----------------------------|-------------------|------------------|------|
| 1 | 12         | 0.25                        | 240           | 3.6                             | 0.5                         | 40 min            | 4.63             | 20.1 |
| 2 | 12         | 0.25                        | 300           | 3.6                             | 0.5                         | 1 h               | 9.4              | 19.1 |
| 3 | 50         | 1                           | 270           | 14.4                            | 2                           | 20 h              | 15.02            | 15.3 |

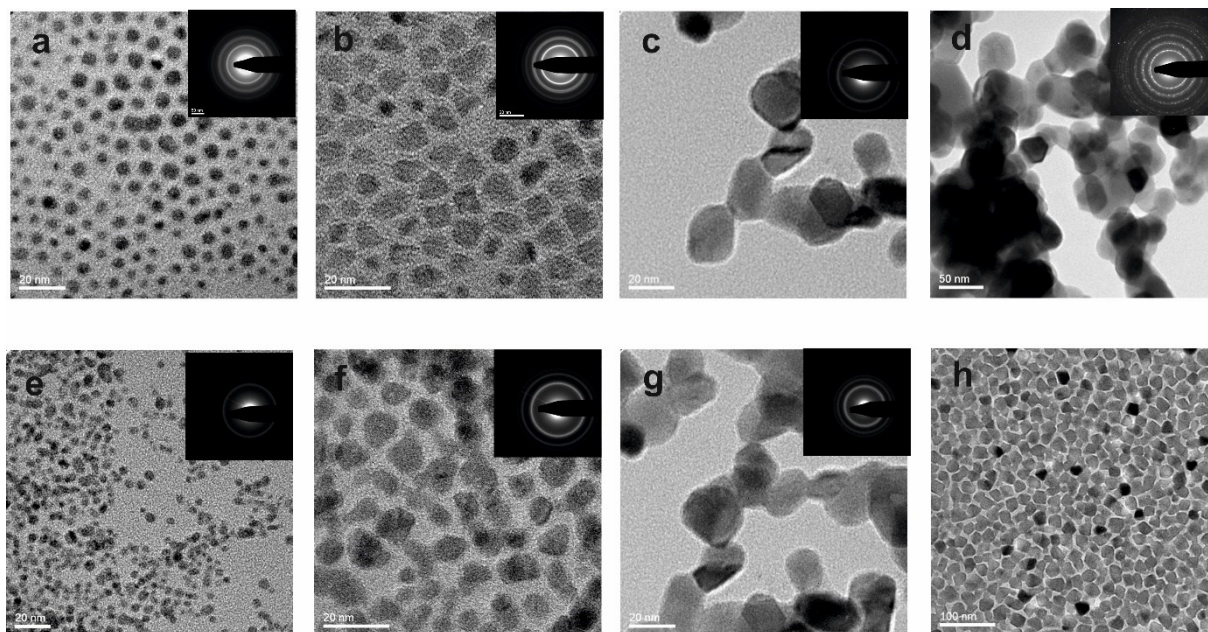

**Figure S1.** TEM images and corresponding selected area electron diffraction patterns of (a) *ca.* 5 nm CoSb NCs, (b) *ca.* 10 nm CoSb NCs, (c) *ca.* 20 nm CoSb NCs, (d) *ca.* 40 nm CoSb NCs, (e) *ca.* 5 nm CoSb<sub>2</sub> NCs, (f) *ca.* 10 nm CoSb<sub>2</sub> NCs and (g) *ca.* 20 nm CoSb<sub>2</sub> NCs. (h) TEM image of *ca.* 20 nm Sb NCs.

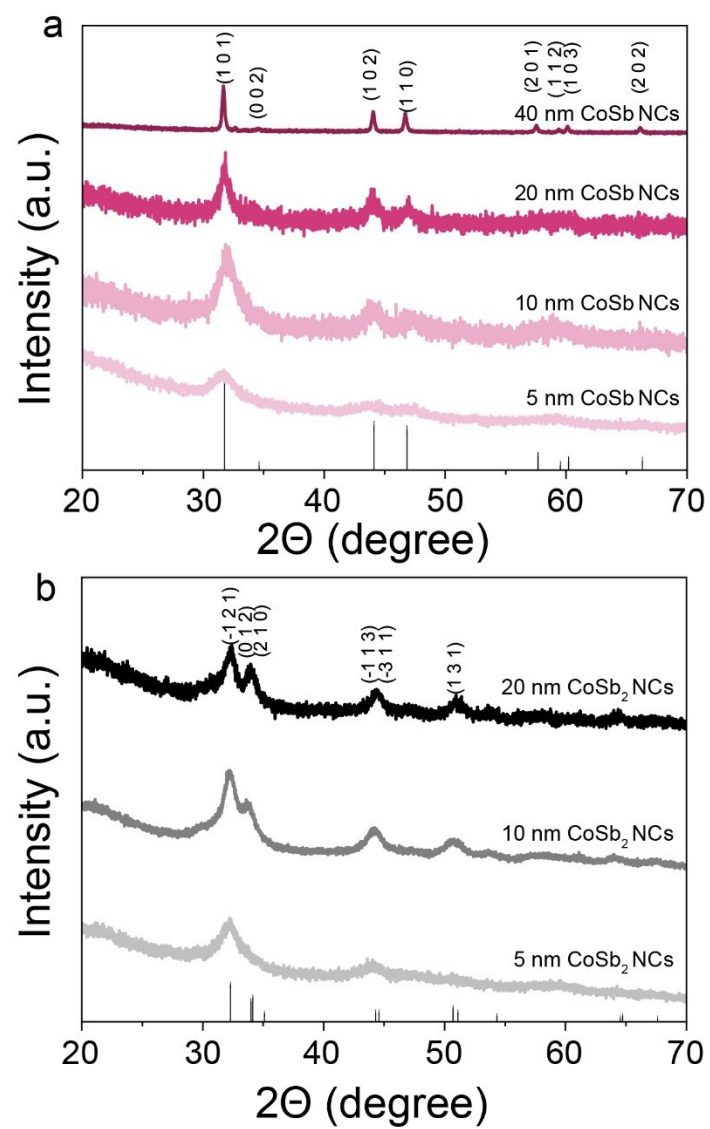

**Figure S2.** XRD patterns of (a) CoSb NCs and (b) CoSb<sub>2</sub> NCs.

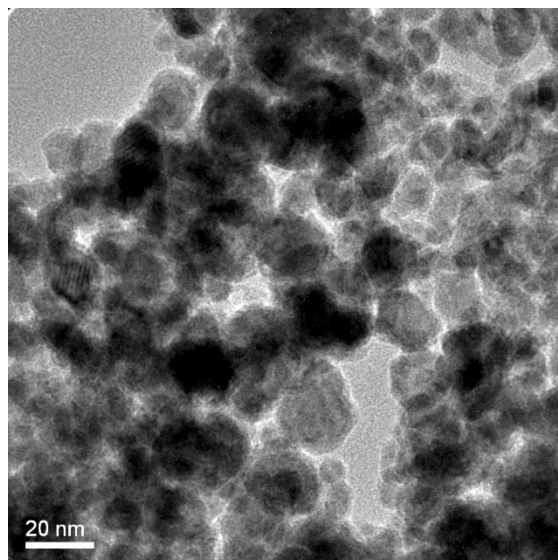

**Figure S3.** TEM image of *ca.* 20 nm CoSb NCs after ligand removal.

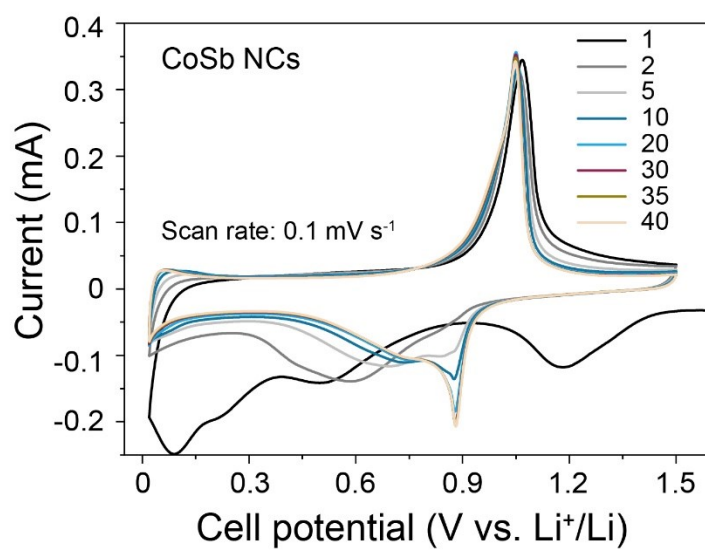

**Figure S4.** Cycling voltammetry curves of *ca.* 20 nm CoSb NCs for 1<sup>st</sup>, 2<sup>nd</sup>, 5<sup>th</sup>, 10<sup>th</sup>, 20<sup>th</sup>, 30<sup>th</sup>, 35<sup>th</sup>, and 40<sup>th</sup> cycles measured at a scan rate of 0.1 mV s<sup>-1</sup>.

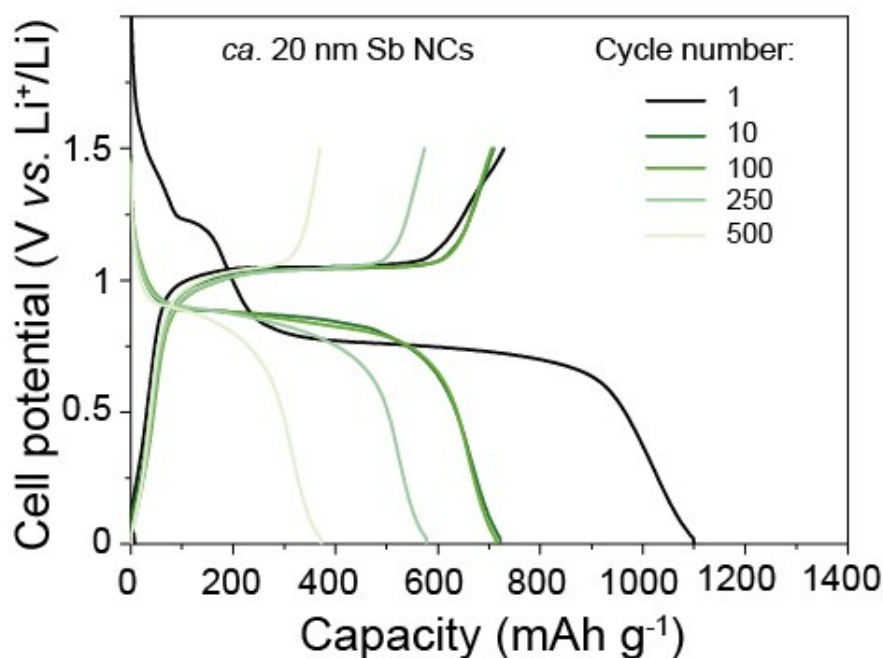

**Figure S5.** Galvanostatic charge-discharge curves of *ca.* 20 nm Sb NCs measured at current density of  $660 \text{ mA g}^{-1}$ . The initially higher capacity of Sb NCs as compared to their theoretical value of  $660 \text{ mAh g}^{-1}$  is attributed to the additional contribution of CB to the measured charge storage capacity.

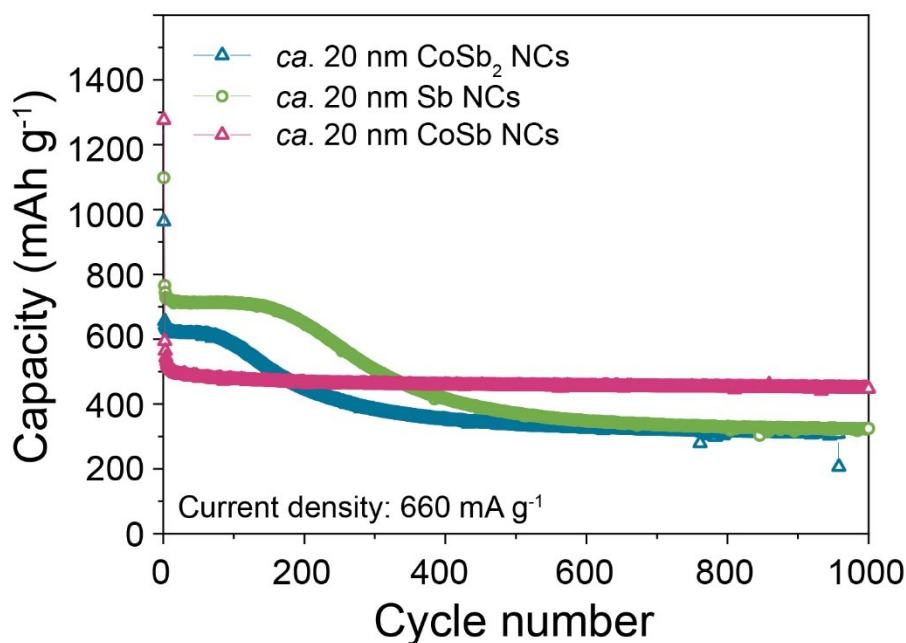

**Figure S6.** Comparison of cycling stability of electrodes composed of *ca.* 20 nm  $\text{CoSb}_2$  NCs, *ca.* 20 nm CoSb NCs, and *ca.* 20 nm Sb NCs. Electrochemical measurements were performed using a half-cell configuration employing Li metal as a reference and counter electrode at a current density of  $660 \text{ mA g}^{-1}$ . The initially higher capacity of  $\text{CoSb}_2$  NCs as compared to their theoretical value of  $531 \text{ mAh g}^{-1}$  is attributed to the additional contribution of CB to the measured charge storage capacity.



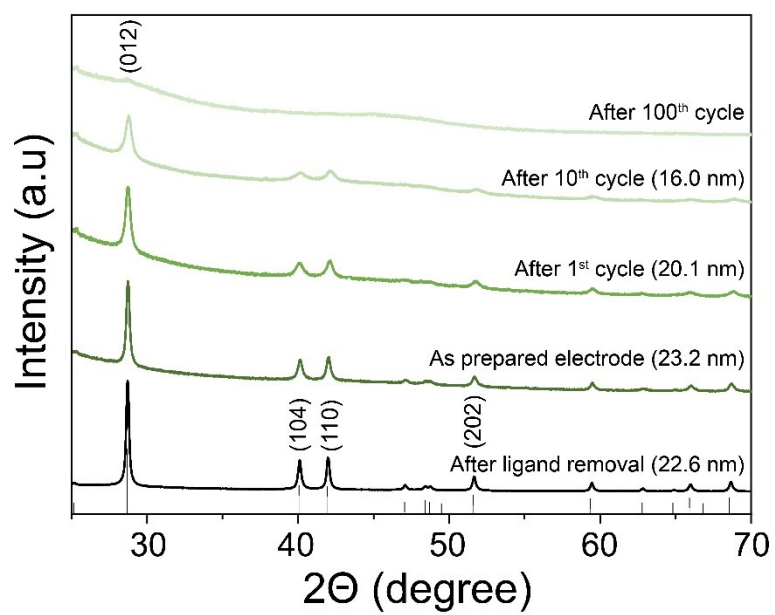

**Figure S7.** XRD patterns of Sb NCs after ligand removal, after electrode preparation, and after 1<sup>st</sup>, 10<sup>th</sup>, and 100<sup>th</sup> cycles.
